# Supplementary material for: Long-Lasting Stable Expression of Human LL-37 Antimicrobial Peptide in Transgenic Barley Plants
Source: MDPI journal article supplement (doi:10.3390/antibiotics10080898), 2021-07-23
Supplement: s1 [file s1]

Article

# Long-Lasting Stable Expression of Human LL-37 Antimicrobial Peptide in Transgenic Barley Plants

Malihe Mirzaee <sup>1</sup>, Edita Holásková <sup>1</sup>, Alžbeta Mičúchová <sup>1</sup>, David J. Kopečný <sup>2</sup>, Zhila Osmani <sup>1</sup> and Ivo Frébort <sup>1,\*</sup>

<sup>1</sup> Centre of Region Haná for Biotechnological and Agricultural Research, Czech Advanced Technology and Research Institute (CATRIN), Palacký University, 783 71 Olomouc, Czech Republic; malihe.mirzaee@upol.cz (M.M.); edita.holaskova@upol.cz (E.H.); alzbeta.micuchova@upol.cz (A.M.); zhila.osmani@upol.cz (Z.O.)

<sup>2</sup> Department of Experimental Biology, Faculty of Science, Palacký University, 783 71 Olomouc, Czech Republic; d.kopecny@upol.cz

\* Correspondence: ivo.frebort@upol.cz; Tel.: +420-585-634-922

## Supplementary Materials

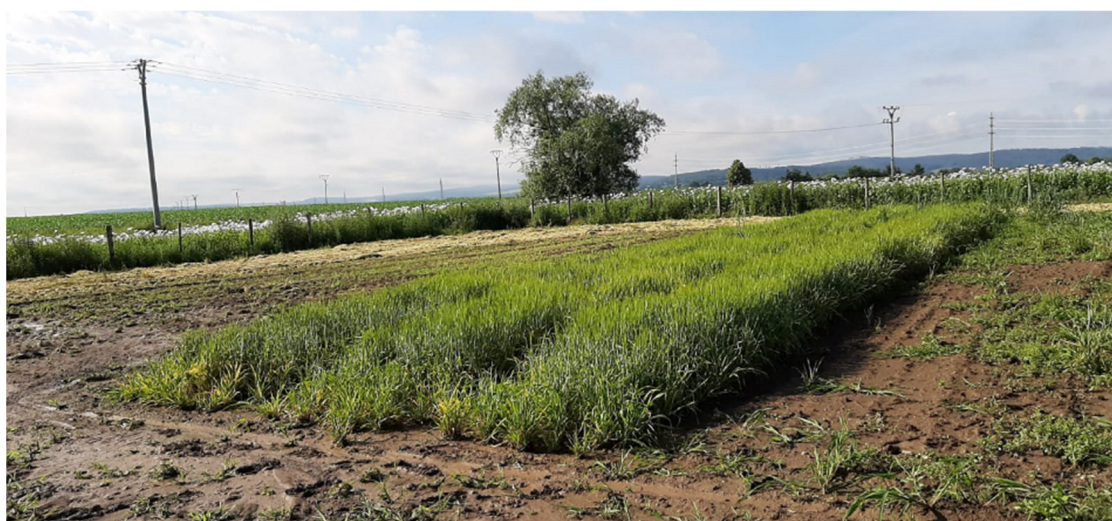

**Figure S1.** Propagation of T6 generation of transgenic MBP::rhLL-37 Golden Promise barley plants in 200 m<sup>2</sup> field trial in 2020. The average yield of the late milk endosperm seeds (BBCH 77) was 0.54 kg fresh weight/m<sup>2</sup>, corresponding to 90 g lyophilized material/m<sup>2</sup>.

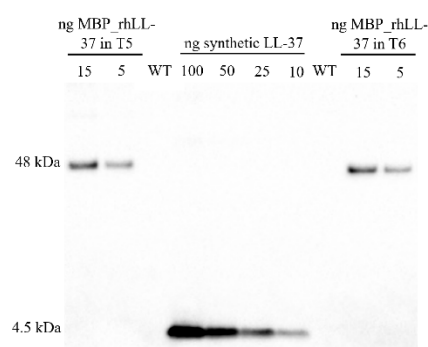

**Figure S2.** Immunoblot analysis of non-lyophilized samples from transgenic T5 and T6 field-grown barley plants expressing endosperm-targeted MBP\_rhLL-37 protein in the late milk endosperm seeds (BBCH 77). Expression levels of MBP\_rhLL-37 in the barley grains were estimated by a semi-quantitative analysis using the calibration curve with synthesized LL-37 peptide (Figure 3b). WT, wild type (non-transformed plant).
